# Supplementary figures and images for: Clinical, Cellular, and Molecular Effects of Corticosteroids on the Response to Intradermal Lipopolysaccharide Administration in Healthy Volunteers
Source: PubMed Central journal article supplement — Clin Pharmacol Ther. 2022 Jan 6;111(4):964–71. doi: 10.1002/cpt.2516 (PMC9305467; doi:10.1002/cpt.2516), 2022-01-06

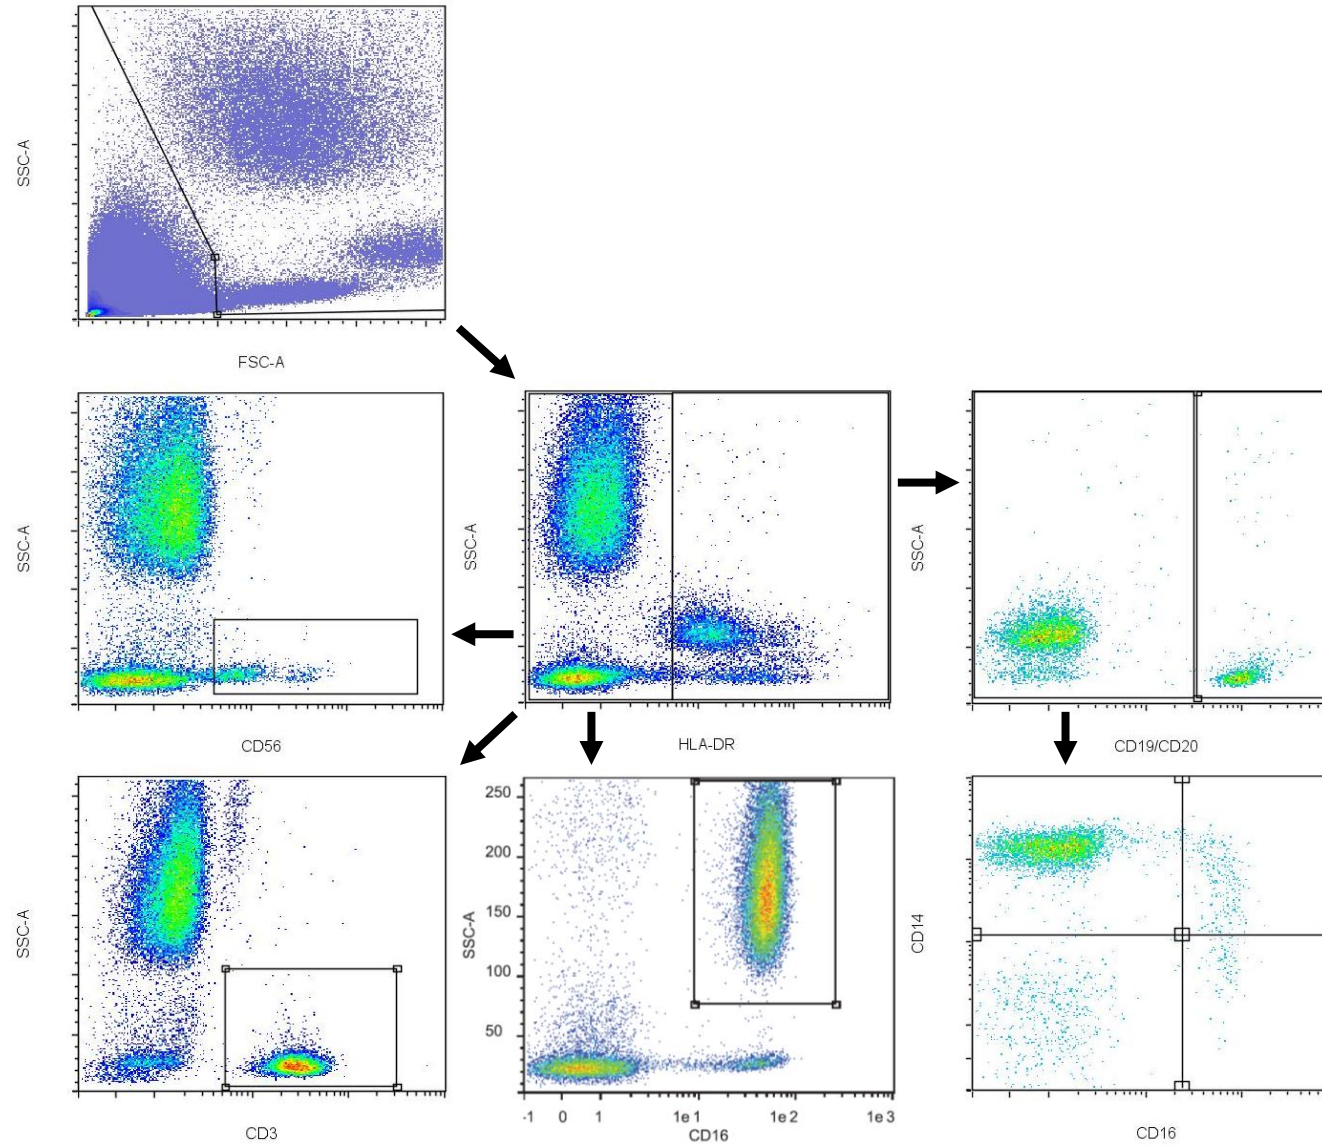

**Supplementary figure 1. Gating strategy.**

Supplement: CPT-111-964-s002.pdf [file CPT-111-964-s002.pdf]
